# Supplementary material for: Changes in Carbon Oxidation State of Metagenomes Along Geochemical Redox Gradients
Source: Front Microbiol. 2019 Feb 11;10:120. doi: 10.3389/fmicb.2019.00120 (PMC6378307; doi:10.3389/fmicb.2019.00120)
Supplement: Supplementary file 1 [file Table_1.XLSX]

## Sheet: Table S1
Changes in Carbon Oxidation State of Metagenomes Along Geochemical Redox Gradients
Table S1: Sequence processing statistics
						available	used	cleaned	non-rRNA	average	subsampled	coding	average	subsampled	average	subsampled
study name (a)	database (b)	type (c)	sample name (d)	sample description (e)	ID (f)	reads (g)	reads (h)	reads (i)	reads (j)	length (k)	reads (l)	reads (m)	length (n)	reads (o)	protein length (p)	proteins (q)
BalticSea_Sediment	SRA	MG	10cm	DNA	ERX509195	106080777	1135003	588019		93.036	537	462397	95.759	522	31.915	1567
BalticSea_Sediment	SRA	MG	11m	63E-6-B (11.35 mbsf)	SRX1537899	3602897	3602897	3121041		104.843	477	2253663	114.612	436	38.197	1309
BalticSea_Sediment	SRA	MG	41m	59E-13-B (40.95 mbsf)	SRX1537877	477466	477466	263536		91.835	544	174843	101.27	494	33.74	1482
BalticSea_Sediment	SRA	MG	47m	63E-24 (47.35 mbsf)	SRX1537900	2038367	2038367	1592300		102.991	485	1129768	112.592	444	37.521	1333
BalticSea_Sediment	SRA	MG	67m	59E-21 (67.50 mbsf)	SRX1537878	1068860	1068860	768311		94.357	530	497670	106.012	472	35.329	1415
BalticSea_Sediment	SRA	MG	81m	59E-25 (80.55 mbsf)	SRX1537882	581599	581599	347916		90.082	555	213232	102.382	488	34.115	1466
BalticSea_Sediment	SRA	MT	10cm	cDNA	ERX509194	92143054	833194	562783	134756	98.634	507	100781	95.69	523	31.892	1568
BalticSea_Sediment	SRA	MT	12m	63E-12mbsf	SRX2869655	17879278	506798	349876	338511	231.261	216	330540	209.362	239	69.714	717
BalticSea_Sediment	SRA	MT	15m	59E-15mbsf	SRX2869654	16934437	1159997	268573	265605	221.69	226	257046	203.626	246	67.8	737
BalticSea_Sediment	SRA	MT	42m	59E-42mbsf	SRX2869653	15420671	521797	329677	326196	227.189	220	317036	206.302	242	68.698	728
Bison_Pool	IMG	MG	N	Bison Pool #1 050719N BXBC	2009439003	40864	40864			594.678	84	26497	909.627	55	199.13	251
Bison_Pool	IMG	MG	S	Bison Pool #4 050719S BXAW	2009439000	51132	51132			550.79	91	36019	786.123	64	184.346	271
Bison_Pool	IMG	MG	R	Bison Pool #3 050719R BXAS	2010170001	43764	43764			583.709	86	33045	784.925	64	195.484	256
Bison_Pool	IMG	MG	Q	Bison Pool #2 050719Q BXBH	2010170002	84577	84577			573.579	87	68101	778.855	64	191.805	261
Bison_Pool	IMG	MG	P	Bison Pool #5 050719P FGGH	2010170003	74755	74755			566.766	88	60103	765.607	65	189.4	264
Diffuse_Vents	SRA	MG	Ginger_Castle	FS848 (Ginger Castle, Von Damm)	ERX947644	4000000	768006	689616		107.513	465	617995	103.382	484	34.456	1451
Diffuse_Vents	SRA	MG	Shrimp_Gulley_2	FS856 (Shrimp Gulley 2, Piccard)	ERX947703	4000000	773268	684107		107.518	465	624848	103.384	484	34.456	1451
Diffuse_Vents	SRA	MG	Marker_33	FS917_Marker33_DNA	ERX2080779	26174287	602031	557770		149.186	335	519588	142.718	350	47.563	1051
Diffuse_Vents	SRA	MG	Marker_113	FS915_Marker113_DNA	ERX2080783	29169063	609089	565146		148.956	336	529763	142.796	350	47.591	1051
Diffuse_Vents	SRA	MG	Anemone	FS914_Anemone_DNA	ERX2080781	20038786	605857	562454		148.925	336	534042	142.978	350	47.652	1049
Diffuse_Vents	SRA	MG	Plume	AnemonePlume_2015_DNA	ERX2080787	25971522	610329	567622		148.839	336	523497	142.301	351	47.426	1054
Diffuse_Vents	SRA	MG	Background	Background_1500m_2015_DNA	ERX2080789	20534909	620412	553293		149.333	335	486566	142.586	351	47.519	1052
Diffuse_Vents	SRA	MT	Marker_33	FS917_Marker33_RNA	ERX2080780	13407821	1284483	309882	309867	149.781	334	216106	140.557	356	46.841	1067
Diffuse_Vents	SRA	MT	Marker_113	FS915_Marker113_RNA	ERX2080784	11178843	1622875	191429	191417	149.652	334	136814	139.964	357	46.641	1072
Diffuse_Vents	SRA	MT	Anemone	FS914_Anemone_RNA	ERX2080782	11933325	1363375	194397	194376	149.202	335	141234	141.403	354	47.123	1061
Diffuse_Vents	SRA	MT	Plume	AnemonePlume_2015_RNA	ERX2080788	27752200	1473177	483305	483303	149.195	335	329614	140.969	355	46.982	1064
Diffuse_Vents	SRA	MT	Background	Background_1500m_2015_RNA	ERX2080790	22798284	1317852	599215	599211	150.081	333	416207	140.967	355	46.981	1064
ETNP_OMZ	SRA	MG	30m	Station 6 Metagenome 30m	SRX648440	1745330	524606	489505		202.265	247	464477	196.592	254	65.494	763
ETNP_OMZ	SRA	MG	85m	Station 6 Metagenome 85m	SRX648442	2688430	546941	509334		189.118	264	473404	186.688	268	62.196	804
ETNP_OMZ	SRA	MG	100m	Station 6 Metagenome 100m	SRX648443	1685782	537077	498784		194.652	257	468758	190.588	262	63.494	787
ETNP_OMZ	SRA	MG	125m	Station 6 Metagenome 125m	SRX648444	1123559	526315	488167		198.531	252	461383	193.152	259	64.348	777
ETNP_OMZ	SRA	MG	300m	Station 6 Metagenome 300m	SRX648445	5479974	560558	518982		185.616	269	471063	185.24	270	61.712	810
ETNP_OMZ	SRA	MT	30m	30m_0.2-1.6micron	SRX854074	1521531	580866	355973	61260	120.775	414	246215	149.974	333	49.901	1002
ETNP_OMZ	SRA	MT	85m	85m_0.2-1.6micron	SRX854078	2058098	600779	369120	70610	114.368	437	249956	150.14	333	49.95	1001
ETNP_OMZ	SRA	MT	100m	100m_0.2-1.6micron	SRX854081	1196535	562210	311835	39508	151.144	331	230201	161.282	310	53.655	932
ETNP_OMZ	SRA	MT	125m	125m_0.2-1.6micron	SRX854083	2063837	583888	368812	62086	121.101	413	253683	150.165	333	49.957	1001
ETNP_OMZ	SRA	MT	300m	300m_0.2-1.6micron	SRX854084	845033	584406	350488	63080	149.634	334	253795	158.998	314	52.897	945
ETSP_OMZ	SRA	MG	15m	Moomz1 15m DNA	SRX080962	556375	556375	442917		274.763	182	432386	238.742	209	79.395	630
ETSP_OMZ	SRA	MG	50m	MOOMZ1 50m DNA	SRX025906	393403	393403	278541		270.221	185	279309	244.115	205	81.298	615
ETSP_OMZ	SRA	MG	65m	Moomz1 65m DNA	SRX080938	419712	419712	328247		272.531	183	329198	244.17	205	81.298	615
ETSP_OMZ	SRA	MG	85m	MOOMZ1 85m DNA	SRX025908	595662	595662	506854		270.226	185	507750	243.947	205	81.231	616
ETSP_OMZ	SRA	MG	110m	MOOMZ1 110m DNA	SRX025910	403227	403227	319679		270.901	185	317295	243.133	206	80.923	618
ETSP_OMZ	SRA	MG	200m	MOOMZ1 200m DNA	SRX025912	516426	516426	427170		268.209	186	413414	241.784	207	80.519	621
ETSP_OMZ	SRA	MG	500m	Moomz1 500m DNA	SRX080950	533824	533824	456968		268.957	186	455673	243.807	205	81.154	616
ETSP_OMZ	SRA	MG	800m	Moomz1 800m DNA	SRX080951	201806	201806	121370		268.65	186	120177	242.068	207	80.53	621
Guerrero_Negro	IMG	MG	01	0-1 mm depth into microbial mat	2004247000	13249	13249			498.595	100	13264	493.17	101	165.572	302
Guerrero_Negro	IMG	MG	02	1-2mm depth into microbial mat	2004247001	12064	12064			478.35	105	12094	472.625	106	158.843	315
Guerrero_Negro	IMG	MG	03	2-3 mm depth into microbial mat	2004247002	13260	13260			488.732	102	13303	482.466	104	162.295	308
Guerrero_Negro	IMG	MG	04	3-4 mm depth into microbial mat	2004247003	13240	13240			487.602	103	13290	481.039	104	161.937	309
Guerrero_Negro	IMG	MG	05	4-5 mm depth into microbial mat	2004247004	15984	15984			487.874	102	16008	482.293	104	162.036	309
Guerrero_Negro	IMG	MG	06	5-6 mm depth into microbial mat	2004247005	13357	13357			501.993	100	13391	495.702	101	166.724	300
Guerrero_Negro	IMG	MG	07	6-10 mm depth into microbial mat	2004247006	15930	15930			493.783	101	15981	487.434	103	163.99	305
Guerrero_Negro	IMG	MG	08	10-22 mm depth into microbial mat	2004247007	13112	13112			484.61	103	13146	478.03	105	160.931	311
Guerrero_Negro	IMG	MG	09	22-34 mm depth into microbial mat	2004247008	13714	13714			492.96	101	13752	486.507	103	163.718	305
Guerrero_Negro	IMG	MG	10	34-49 mm depth into microbial mat	2004247009	12012	12012			478.393	105	12039	472.056	106	158.857	315
HOT_ALOHA	SRA	MG	25m	H179_25m_gDNA	SRX002155	385193	381208	342906		109.955	455	300544	104.608	478	34.828	1436
HOT_ALOHA	SRA	MG	75m	H179_75m_gDNA	SRX000174	414323	409190	360183		111.656	448	317212	105.715	473	35.182	1421
HOT_ALOHA	SRA	MG	125m	H179_125m_gDNA	SRX002157	348394	348394	313741		111.041	450	275567	104.655	478	34.776	1438
HOT_ALOHA	SRA	MG	500m	H179_500m_gDNA	SRX002159	393581	387617	328458		108.606	460	304041	103.844	481	34.554	1447
HOT_ALOHA	SRA	MT	25m	H179_25m_cDNA	SRX002156	87291	87291	70993	39654	110.898	451	53387	104.811	477	34.748	1439
HOT_ALOHA	SRA	MT	75m	H179_75m_cDNA	SRX000175	128234	126874	107013	46368	112.792	443	76734	108.02	463	35.867	1394
HOT_ALOHA	SRA	MT	125m	H179_125m_cDNA	SRX002158	115067	115067	94313	53633	107.163	467	68936	103.89	481	34.544	1447
HOT_ALOHA	SRA	MT	500m	H179_500m_cDNA	SRX002160	122250	122250	100454	60712	105.833	472	73974	103.358	484	34.333	1456
Menez_Gwen	SRA	MG	WdCr-f2	Woody Crack front 2	ERX1158314	23679001	451113	418823		230.166	217	409413	209.105	239	69.644	718
Menez_Gwen	SRA	MG	Wd-10L	Woody (10 cm left)	ERX1158315	14648694	448074	406600		241.425	207	392584	214.267	233	71.345	701
Menez_Gwen	SRA	MG	Wd-40UP	Woody (40 cm above)	ERX1158316	19243665	450790	402358		240.897	208	391180	218.263	229	72.686	688
Mono_Lake	SRA	MT	10m	10 m sample A	SRX1527166	10679825	1814431	523182	383232	148.682	336	413489	138.705	360	46.178	1083
Mono_Lake	SRA	MT	15m	15 m sample A	SRX1527805	12788624	1672133	580674	408360	148.346	337	469277	138.299	362	46.045	1086
Mono_Lake	SRA	MT	18m	18 m sample A	SRX1527807	14775443	1466274	658650	526601	148.364	337	566488	139.231	359	46.364	1078
Mono_Lake	SRA	MT	25m	25 m sample A	SRX1527809	22029553	1666423	579153	413329	148.985	336	479934	139.218	359	46.353	1079
Mono_Lake	SRA	MT	31m	31 m sample A	SRX1527811	16008216	1598676	571974	423814	148.107	338	483735	138.646	361	46.165	1083
Mud_Volcano	SRA	MG	3cm	C317 metagenome	SRX111280	495960	495960	373338		346.215	144	384622	308.11	162	102.552	488
Mud_Volcano	SRA	MG	13cm	C313 metagenome	SRX111279	488597	488597	445604		327.995	152	442617	300.419	166	99.998	500
Mud_Volcano	SRA	MG	23cm	C307 metagenome	SRX111278	335045	335045	282848		238.144	210	259738	232.875	215	77.471	645
Mud_Volcano	SRA	MG	31cm	C303 metagenome	SRX111277	511350	511350	418456		359.064	139	428127	313.364	160	104.314	479
Organic_Lake	SRA	MG	1.7m	GS374SM-4F-01-760	SRX024781	536138	536138	357451		506.536	99	378891	410.754	122	136.477	366
Organic_Lake	SRA	MG	4.2m	GS375SM-4F-01-754	SRX024782	535242	535242	397822		516.567	97	421851	419.523	119	139.447	359
Organic_Lake	SRA	MG	5.7m	GS376SM-4F-01-773	SRX024783	549620	549620	418645		518.45	96	446371	422.993	118	140.704	355
Organic_Lake	SRA	MG	6.5m	GS377SM-4F-01-688	SRX024784	529793	529793	300916		545.039	92	330749	390.079	128	129.404	386
Organic_Lake	SRA	MG	6.7m	GS378SM-4F-01-765	SRX024843	623785	623785	477882		510.132	98	518641	415.785	120	138.342	361
Serpentinite_Springs	MGRAST	MG	LostCity	Lost City (reads)	4461585.3	46360	46360	43167		779.025	64	54278	558.287	90	186.008	269
Serpentinite_Springs	MGRAST	MG	WHC2B	WHC2B sff	4460690.3	118348	118348	72767		514.062	97	81270	410.893	122	136.654	366
Serpentinite_Springs	MGRAST	MG	TLE	TLE sff	4460689.3	135538	135538	37914		542.5	92	37402	362.271	138	120.321	416
Shimokita_Peninsula	GenBank	MG	0.8m	1H-1	BARS01000001.1 - BARS01060478.1	60478	60478			807.313	62	73903	604.921	83	201.6	248
Shimokita_Peninsula	GenBank	MG	5.1m	1H-4	BART01000001.1 - BART01044241.1	44241	44241			772.536	65	59764	551.443	91	183.772	272
Shimokita_Peninsula	GenBank	MG	18.6m	3H-2	BARU01000001.1 - BARU01051978.1	51978	51978			766.737	65	64559	546.584	91	182.157	274
Shimokita_Peninsula	GenBank	MG	48.5m	6H-3	BARV01000001.1 - BARV01048200.1	48200	48200			768.558	65	59236	558.283	90	186.059	269
Shimokita_Peninsula	GenBank	MG	107.0m	12H-4	BARW01000001.1 - BARW01045500.1	45500	45500			772.536	65	56153	543.131	92	181.007	276
Yellowstone_Park	IMG	MG	Ar-red	Archaeal: Sites 01, 02, 03, 19, 04, 18	2022920009,2022920014,2014031003,2022920017,2022920008,2022920019	61051	61051			1303.31	38	97232	702.889	71	169.205	296
Yellowstone_Park	IMG	MG	Aq-red	Aquificales-reducing: Sites 09, 10, 12	2022920010,2022920015,2022920011	20768	20768			1365.39	37	33187	744.414	67	176.443	283
Yellowstone_Park	IMG	MG	Aq	Aquificales: Sites 14, 11, 13	2022920007,2022920012,2022920006	33595	33595			1221.33	41	48920	736.994	68	173.081	289
Yellowstone_Park	IMG	MG	Ph-red	Phototroph-reducing: Sites 05, 20	2022920003,2022920020	71708	71708			888.486	56	91534	630.98	79	159.689	313
Yellowstone_Park	IMG	MG	Ph	Phototroph: Sites 06, 07, 15, 16	2022920004,2022920013,2022920016,2022920018	134761	134761			886.495	56	172849	628.479	80	160.78	311
(a) study name used in this study
(b) SRA, IMG, or MGRAST
(c) MG (metagenome) or MT (metatranscriptome)
(d) sample name used in this study
(e) sample ID from NCBI SRA or other database, or sample name used in other publications
(f) SRA accession or ID for other database
NOTE: for Yellowstone_Park, sequences from multiple samples were combined for analysis
in this study
(g) total number of available reads
NOTE: for IMG, these are assembled contigs, not sequencing reads
(h) number of reads used for analysis in this study
NOTE: these reads were selected by downloading the first part of the SRA FASTA file
(in .gz format) from the SRA web page
(https://trace.ncbi.nlm.nih.gov/Traces/sra/sra.cgi?view=search_seq_name)
(i) number of reads after adapter trimming, length filtering, and dereplication (not applied to IMG data)
(j) number of reads not assigned as rRNA by sortmeRNA (metatranscriptomic studies only)
(k) the average length of the reads in (h), (i) or (j)
(l) number of reads subsampled to calculate nucleobase compositions for an average of
50000 bases (subsampling performed 100 times to calculate standard deviations)
(m) number of coding reads identified by FragGeneScan
NOTE: this can be higher than the number of input reads due to the algorithm
used by FragGeneScan
(n) the average length of the protein-coding reads
(o) number of protein-coding reads subsampled to calculate nucleobase compositions for an
average of 50000 bases
(p) the average length of the predicted proteins
(q) number of proteins subsampled to calculate amino acid compositions for an average
of 50000 amino acids

## Sheet: Table S2
Changes in Carbon Oxidation State of Metagenomes Along Geochemical Redox Gradients
Table S2: Taxonomic classification statistics
									taxid 1420917 (Marinobacter salarius)				taxid 28108 (Alteromonas macleodii)				taxid 1427364,1125411 (Ca.Thioglobus singularis)				taxid 563040 (Sulfurimonas autotrophicaDSM 16294)				taxid 1977865 (Ca.Pelagibacter sp. RS40)
study name (a)	sample name (b)	sample description (c)	experiment (d)	run(s) (e)	total reads (f)	cleaned reads (g)	classified reads (h)		reads (i)	average length (j)	subsampled (k)		reads (i)	average length (j)	subsampled (k)		reads (i)	average length (j)	subsampled (k)		reads (i)	average length (j)	subsampled (k)		reads (i)	average length (j)	subsampled (k)
Diffuse_Vents	Ginger_Castle	FS848 (Ginger Castle, Von Damm)	ERX947644	ERR868033,ERR868036,ERR868042,ERR868043,ERR868049	20000000	15996898	155303		8	214.75	47		25	215.72	46		176	215.739	46		3377	215.495	46		89	215.562	46
Diffuse_Vents	Shrimp_Gulley_2	FS856 (Shrimp Gulley 2, Piccard)	ERX947703	ERR868102	4000000	3316736	38234		1	216	46		1	216	46		0	NA	NA		729	215.49	46		13	215.231	46
Diffuse_Vents	Marker_33	FS917_Marker33_DNA	ERX2080779	ERR2021503	26174287	21989510	550251		1984	298.835	33		50	298.84	33		726	299.997	33		7068	299.626	33		547	300.132	33
Diffuse_Vents	Marker_113	FS915_Marker113_DNA	ERX2080783	ERR2021507	29169063	23429011	912481		59821	297.746	34		9	301	33		397	298.874	33		4036	299.278	33		299	298.716	33
Diffuse_Vents	Anemone	FS914_Anemone_DNA	ERX2080781	ERR2021505	20038786	15715106	261701		4337	296.914	34		13	300.538	33		1400	299.255	33		2808	299.318	33		471	299.73	33
Diffuse_Vents	Plume	AnemonePlume_2015_DNA	ERX2080787	ERR2021511	25971522	20052228	330525		2876	297.145	33		375	297.552	34		5795	299.456	33		2408	299.415	33		2189	299.284	33
Diffuse_Vents	Background	Background_1500m_2015_DNA	ERX2080789	ERR2021513	20534909	13608903	477658		31518	298.925	33		14342	298.914	33		2970	300.158	33		6	301.667	33		1982	300.498	33
									taxid 1420917 (Marinobacter salarius)				taxid 28108 (Alteromonas macleodii)				taxid 1427364 (Ca.Thioglobus singularis)				taxid 1410606 (Ca.Nitrosopelagicus brevis)				taxid 1898749 (Ca.Nitrosomarinus catalina)
study name (a)	sample name (b)	sample description (c)	experiment (d)	run (e)	total reads (f)	cleaned reads (g)	classified reads (h)		reads (i)	average length (j)	subsampled (k)		reads (i)	average length (j)	subsampled (k)		reads (i)	average length (j)	subsampled (k)		reads (i)	average length (j)	subsampled (k)		reads (i)	average length (j)	subsampled (k)
Menez_Gwen	WdCr-f2	Woody Crack front 2	ERX1158314	ERR1078300	23679001	20882167	583186		437	462.986	22		4496	471.717	21		2001	491.356	20		7851	492.423	20		2128	491.215	20
Menez_Gwen	Wd-10L	Woody (10 cm left)	ERX1158315	ERR1078301	14648694	11721936	397432		67	495.209	20		21841	494.891	20		668	498.626	20		434	499.772	20		123	500.504	20
Menez_Gwen	Wd-40UP	Woody (40 cm above)	ERX1158316	ERR1078302	19243665	16948409	381459		260	479.904	21		1062	476.207	20		1160	494.492	20		239	496.372	20		65	491.215	20
									taxid 28108 (Alteromonas macleodii)				taxid 1427364 (Ca.Thioglobus singularis)				taxid 1977865 (Ca.Pelagibacter sp. RS40)
study name (a)	sample name (b)	sample description (c)	experiment (d)	run (e)	total reads (f)	cleaned reads (g)	classified reads (h)		reads (i)	average length (j)	subsampled (k)		reads (i)	average length (j)	subsampled (k)		reads (i)	average length (j)	subsampled (k)
ETNP_OMZ	30m	Station 6 Metagenome 30m	SRX648440	SRR1509790	1745330	1606508	91561		91	405.209	25		768	460.212	22		901	447.849	22
ETNP_OMZ	85m	Station 6 Metagenome 85m	SRX648442	SRR1509792	2688430	2457166	41024		540	407.217	25		3480	436.57	23		1075	431.061	23
ETNP_OMZ	100m	Station 6 Metagenome 100m	SRX648443	SRR1509793	1685782	1541956	20152		363	395.179	25		515	443.862	23		452	435.883	23
ETNP_OMZ	125m	Station 6 Metagenome 125m	SRX648444	SRR1509794	1123559	1030508	13330		565	390.345	26		231	445.247	22		231	429.571	23
ETNP_OMZ	300m	Station 6 Metagenome 300m	SRX648445	SRR1509796	5479974	4831761	69395		233	347.004	29		1137	442.792	23		1039	435.432	23
									taxid 1427364 (Ca.Thioglobus singularis)				taxid 1977865 (Ca.Pelagibacter sp. RS40)				taxid 1410606 (Ca.Nitrosopelagicus brevis)				taxid 1898749 (Ca.Nitrosomarinus catalina)
study name (a)	sample name (b)	sample description (c)	experiment (d)	run (e)	total reads (f)	cleaned reads (g)	classified reads (h)		reads (i)	average length (j)	subsampled (k)		reads (i)	average length (j)	subsampled (k)		reads (i)	average length (j)	subsampled (k)		reads (i)	average length (j)	subsampled (k)
ETSP_OMZ	15m	Moomz1 15m DNA	SRX080962	SRR304684	556375	442917	19488		795	264.142	38		320	279.516	36		43	263.326	38		850	275.089	36
ETSP_OMZ	50m	MOOMZ1 50m DNA	SRX025906	SRR064444	393403	278541	12244		891	262.994	38		208	279.654	36		1346	266.01	38		3119	270.695	37
ETSP_OMZ	65m	Moomz1 65m DNA	SRX080938	SRR304656	419712	328247	17708		1672	262.42	38		247	281.688	36		1332	266.628	38		7129	271.034	37
ETSP_OMZ	85m	MOOMZ1 85m DNA	SRX025908	SRR064446	595662	506854	22805		2321	263.395	38		421	279.577	36		1659	265.973	38		8737	270.994	37
ETSP_OMZ	110m	MOOMZ1 110m DNA	SRX025910	SRR064448	403227	319679	6102		402	266.473	38		215	285.107	35		220	266.955	37		1254	270.753	37
ETSP_OMZ	200m	MOOMZ1 200m DNA	SRX025912	SRR064450	516426	427170	5120		199	269.608	37		280	281.65	36		19	265.684	38		111	274.126	36
ETSP_OMZ	500m	Moomz1 500m DNA	SRX080950	SRR304668	533824	456968	5296		243	270.399	37		195	284.928	35		232	269.694	37		223	268.767	37
ETSP_OMZ	800m	Moomz1 800m DNA	SRX080951	SRR304683	201806	121370	1860		38	273.026	37		31	284.71	35		57	266.93	37		163	270.546	37
									taxid 1427364 (Ca.Thioglobus singularis)				taxid 1977865 (Ca.Pelagibacter sp. RS40)				taxid 1410606 (Ca.Nitrosopelagicus brevis)				taxid 1898749 (Ca.Nitrosomarinus catalina)				taxid 680 (Vibrio campbellii)				taxid 146891 (Prochlorococcus marinusstr. AS9601)
study name (a)	sample name (b)	sample description (c)	experiment (d)	run (e)	total reads (f)	cleaned reads (g)	classified reads (h)		reads (i)	average length (j)	subsampled (k)		reads (i)	average length (j)	subsampled (k)		reads (i)	average length (j)	subsampled (k)		reads (i)	average length (j)	subsampled (k)		reads (i)	average length (j)	subsampled (k)		reads (i)	average length (j)	subsampled (k)
HOT_ALOHA-2010	25m	HOT224_1_0025m	SRX2334639	SRR5002342	34397773	29241635	8234634		196	300.658	33		74788	300.411	33		23	299.957	33		43	301	33		135	300.533	33		980859	300.47	33
HOT_ALOHA-2010	45m	HOT224_1_0045m	SRX2334707	SRR5002410	19138710	16315346	4719277		138	300.449	33		46644	300.429	33		66	300.333	33		21	300.762	33		26	300.077	33		563083	300.444	33
HOT_ALOHA-2010	75m	HOT224_1_0075m	SRX2334640	SRR5002343	31217189	26662028	7590737		144	300.521	33		55014	300.428	33		75	300.133	33		17	301.294	33		41	297.171	34		906486	300.466	33
HOT_ALOHA-2010	125m	HOT224_1_0125m	SRX2334668	SRR5002371	16778652	14541745	3210539		76	299.763	33		13551	300.456	33		510	300.476	33		25	300.6	33		375	300.629	33		277731	300.415	33
HOT_ALOHA-2010	200m	HOT224_1_0200m	SRX2334697	SRR5002400	13778827	12153681	230959		78	300.436	33		3309	300.52	33		91631	300.366	33		331	300.372	33		3057	300.324	33		373	300.038	33
HOT_ALOHA-2010	500m	HOT224_1_0500m	SRX2334652	SRR5002355	19571888	17029182	197332		3463	300.523	33		4722	300.441	33		5885	300.395	33		1837	300.473	33		824	300.125	33		1462	300.199	33
HOT_ALOHA-2010	770m	HOT224_1_0770m	SRX2334669	SRR5002372	19522479	17027004	357853		2791	300.413	33		4483	300.507	33		9451	300.525	33		2838	300.521	33		19822	300.256	33		948	299.842	33
HOT_ALOHA-2010	1000m	HOT224_1_1000m	SRX2334641	SRR5002344	25129694	21844391	563135		2341	300.469	33		4802	300.511	33		8453	300.54	33		2369	300.549	33		118558	300.326	33		2310	300.073	33
(a) study name used in this study
(b) sample name used in this study
(c) sample ID from NCBI SRA, or sample name used in other publications
(d) NCBI Sequence Read Archive (SRA) experiment ID
(e) SRA run ID. NOTE: multiple runs available for Ginger_Castle were combined to get enough
reads to plot Candidatus Thioglobus singularis in Fig. 5
(f) total number of reads in these runs
(g) number of reads after adapter trimming, length filtering, and dereplication
(h) number of cleaned reads classified by Kraken using the
minikraken_20171101_8GB_dustmasked database
NOTE: for Diffuse_Vents, two taxids were used (the second refers to strain PS1) to get enough
reads to plot Candidatus Thioglobus singularis at Ginger_Castle in Fig. 5
(i) number of reads classified to this taxid
(j) the average length of these reads
(k) number of reads subsampled to calculate nucleobase compositions for an average of 10000
bases (subsampling performed 100 times to calculate standard deviations)
NOTE: if the number of reads classified to a species is not at least twice the subsample size,
the data are not plotted in Fig. 5
